# Supplementary material for: Spontaneously restored electrical conductivity of bioactive gel comprising mussel adhesive protein-coated carbon nanotubes
Source: Royal Society of Chemistry journal article supplement (doi:10.1039/c6ra19468k), 2016-01-01
Supplement: c6ra19468k1.pdf [file c6ra19468k1.pdf]

Supporting information for

## Spontaneously Restored Electrical Conductivity of Bioactive Gel Comprising Mussel Adhesive Protein-Coated Carbon Nanotubes

Hyunjung Lee<sup>1</sup>, Yu-Mi Ha<sup>1,2</sup>, Sang Hyun Lee<sup>1</sup>, Young-il Ko<sup>3</sup>, Hiroyuki Muramatsu<sup>3</sup>, Yoong Ahm Kim<sup>4</sup>, Min Park<sup>1</sup>, Yong Chae Jung<sup>1,5,\*</sup>

<sup>1</sup>Institute of Advanced Composite Materials, Korea Institute of Science and Technology (KIST), Chudong-ro 92, Bongdong-eup, Wanju-gun, Jeonbuk 565-905, Republic of Korea  
E-mail: ycjung@kist.re.kr

<sup>2</sup>School of Materials Science and Engineering, Gwangju Institute of Science and Technology (GIST), 123 Cheomdangwagi-ro, Buk-gu, Gwangju 500-712, Republic of Korea

<sup>3</sup>Faculty of Engineering, Shinshu University, 4-17-1 Wakasato, Nagano 380-8553 (Japan)

<sup>4</sup>Alan G. MacDiarmid Energy Research Institute, School of Polymer Science and Engineering & Department of Polymer Engineering, Graduate School, Chonnam National University, 77 Yongbong-ro, Buk-gu, Gwangju 500-757, Republic of Korea

<sup>5</sup>Department of Nanomaterials and Nano Science, Korea University of Science and technology (UST), Daejeon 305-350, Republic of Korea

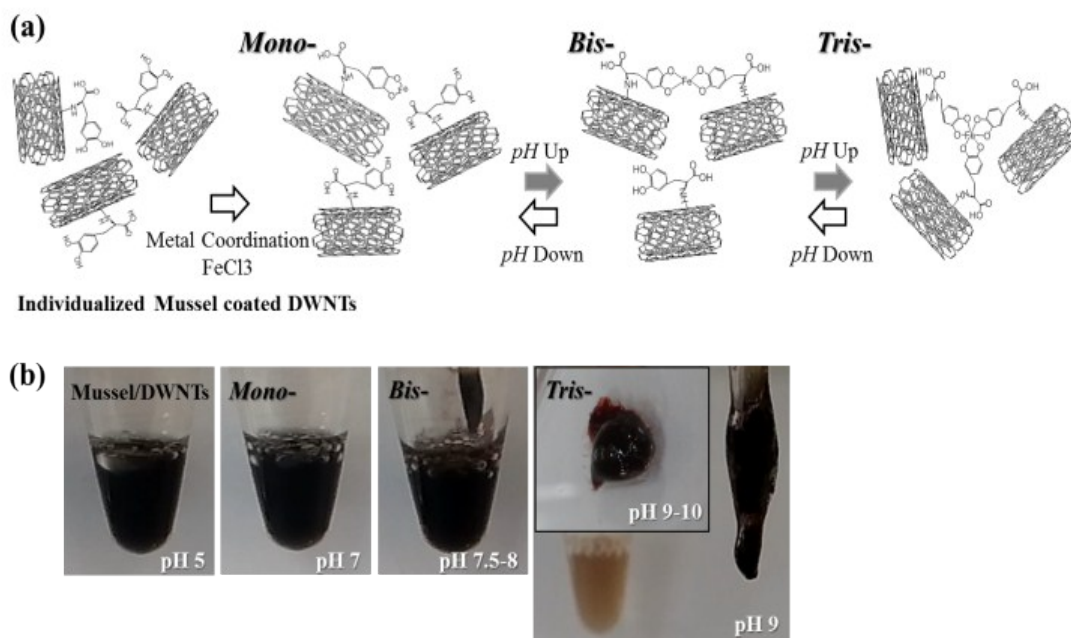

**Figure S1** (a) Schematic diagram of DWNTs-MAP catechol (DOPA)- $\text{Fe}^{3+}$  coordination bonding. (b) Digital images showing the sol-gel phase transition of the DWNTs-MAP solution with changes in the *pH*.

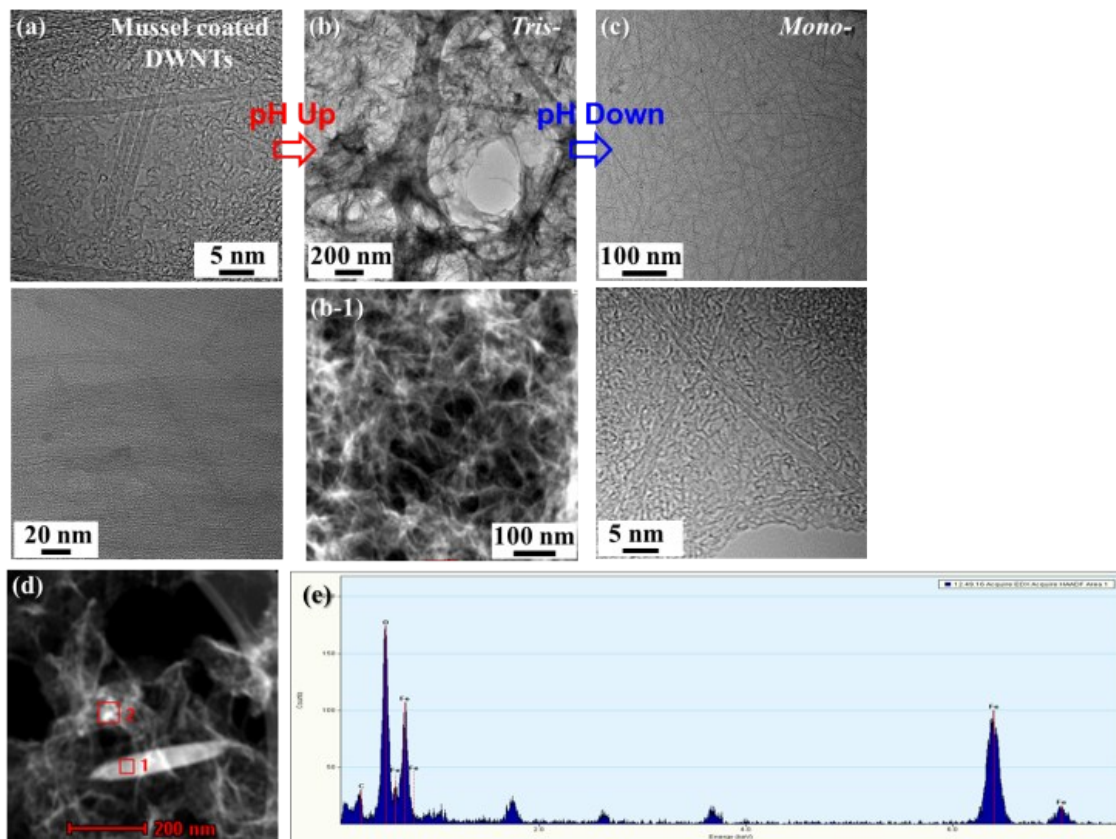

**Figure S2** TEM and EDAX images; (a) DWNTs-MAPs hybrid solution, (b) *tris-* (*pH* 9~10) with (b-1) STEM mode, (c) *mono-* (*pH* 2) and (e) EDAX analysis of red box of insert of (d).

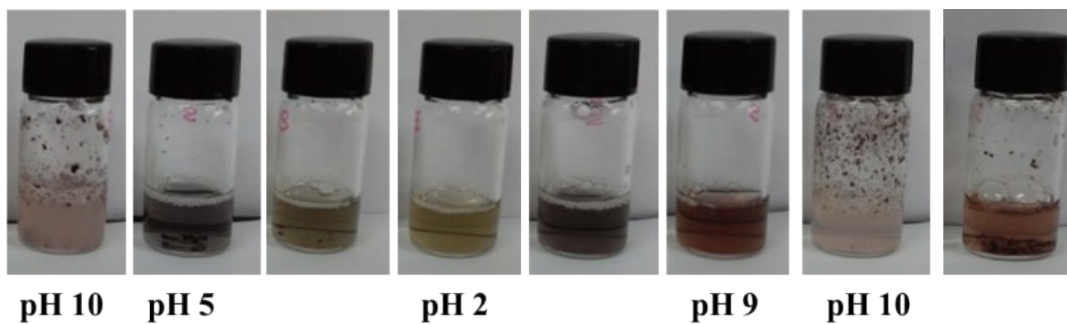

**Figure S3** Photos showing DWNTs-MAPs solutions at different dispersion states: original, mussel wrapped DWNTs solution *bis-* (*pH* 7), *tris-* (*pH* 9~10), *mono-* (*pH* 2), 2<sup>nd</sup> *tris-* (*pH* 9~10), and 3<sup>th</sup> *tris-* (*pH* 9~10), of digital images of color transition of DWNTs in mussel solution according to *pH* switching, respectively.

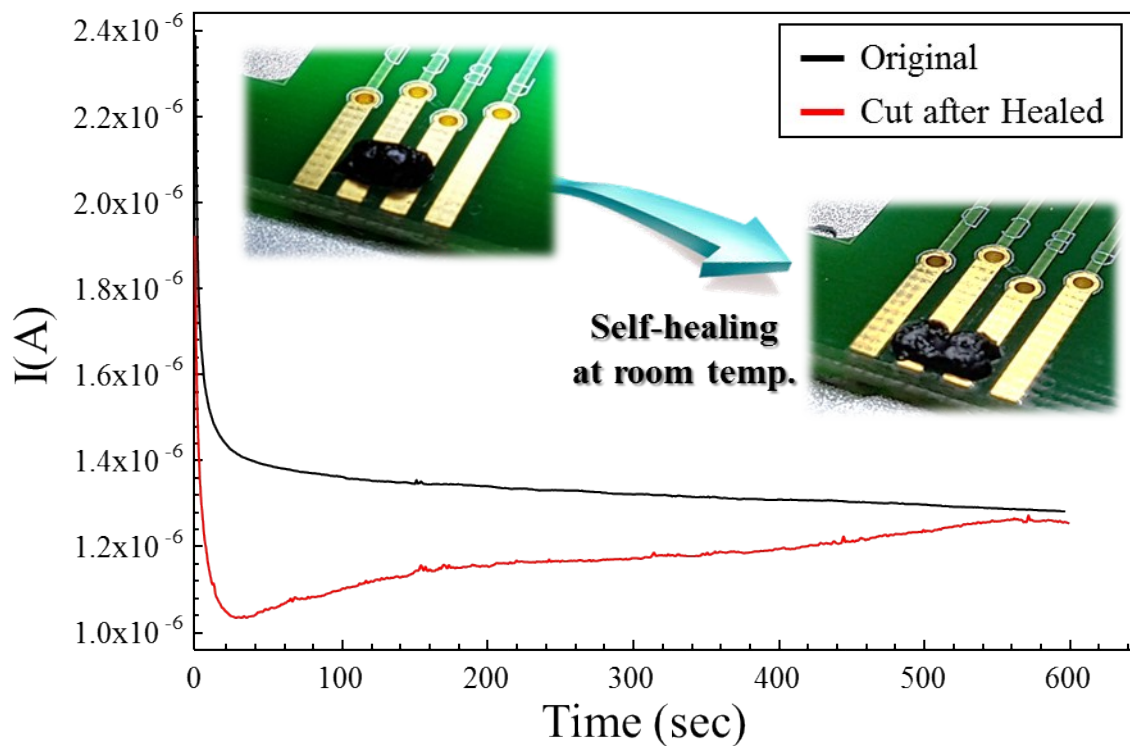

**Figure S4.** The time-dependent changes in the electrical conductivity of the hybrid gel. Note that the current value of the mechanically cut sample was back to that of the original one within 600 seconds.
